# Supplementary material
Source: Research Square preprint supplement (doi:10.21203/rs.3.rs-9161166/v1)
Supplement: Supplementary file 1 [file 5bb08b5bb899c01375c0ad0a.docx]

Supplementary Table S1. Detailed distribution of etiological subtypes

| **Etiology group** | **Specific subtype** | **n** | **% within etiology group** |
| --- | --- | --- | --- |
| Congenital (n=46) | Small C-shaped ring (narrow membranous portion) | 11 | 23.9% |
|  | Funnel-shaped stenosis | 6 | 13.0% |
|  | O-shaped ring (complete tracheal ring) | 5 | 10.9% |
|  | Bronchial bridging (tracheal bronchus) | 6 | 13.0% |
|  | Web-like (membranous) stenosis | 4 | 8.7% |
|  | Others (including distortion/tortuosity, unspecified, etc.) | 14 | 30.4% |
| Cardiac compression (n=66) | Innominate artery compression | 13 | 19.7% |
|  | Pulmonary artery sling | 9 | 13.6% |
|  | Double aortic arch | 5 | 7.6% |
|  | Cardiomegaly (secondary to VSD/ASD/PDA, etc.) | 20 | 30.3% |
|  | Other vascular compression (including left superior pulmonary vein compression, bovine aortic arch, right aortic arch, etc.) | 19 | 28.8% |
| Dynamic (n=21) | Tracheomalacia (mild/moderate/severe) | 13 | 61.9% |
|  | Left main bronchomalacia (mild/moderate/severe) | 5 | 23.8% |
|  | Right main bronchomalacia (moderate) | 1 | 4.8% |
|  | Tracheobronchomalacia (mixed) | 2 | 9.5% |
| Acquired (n=17) | Post-intubation cicatricial stenosis | 5 | 29.4% |
|  | Post-tuberculosis stenosis | 7 | 41.2% |
|  | Scar hyperplasia/stenosis of unknown cause | 2 | 11.8% |
|  | Exogenous foreign body | 1 | 5.9% |
|  | Laryngeal/tracheal papillomatosis | 1 | 5.9% |
|  | Right main bronchial tumor | 1 | 5.9% |
