# Supplementary material
Source: Research Square preprint supplement (doi:10.21203/rs.3.rs-9161166/v1)
Supplement: Supplementary file 2 [file ec8750fa510f464ba4133354.docx]

Supplementary Table S2. Comorbidities and past medical history by etiology group

S2A. Prevalence of specific comorbidities (each item calculated separately)

| **Comorbidity** | **Congenital**  **(n=46)** | **Cardiac compression**  **(n=66)** | **Dynamic**  **(n=21)** | **Acquired**  **(n=17)** |
| --- | --- | --- | --- | --- |
| Prematurity | 7 (15.2%) | 9 (13.6%) | 7 (33.3%) | 4 (23.5%) |
| Malnutrition | 3 (6.5%) | 8 (12.1%) | 3 (14.3%) | 2 (11.8%) |
| Atopy | 2 (4.3%) | 2 (3.0%) | 0 (0.0%) | 6 (35.3%) |
| Cerebral palsy | 2 (4.3%) | 4 (6.1%) | 1 (4.8%) | 0 (0.0%) |
| Esophageal atresia | 0 (0.0%) | 0 (0.0%) | 4 (19.0%) | 0 (0.0%) |
| BPD | 0 (0.0%) | 0 (0.0%) | 4 (19.0%) | 2 (11.8%) |
| History of endotracheal intubation | 0 (0.0%) | 0 (0.0%) | 0 (0.0%) | 5 (29.4%) |
| Other malformations/syndromes | 4 (8.7%)* | 2 (3.0%)† | 0 (0.0%) | 0 (0.0%) |
| Any comorbidity (patients) | 15 (32.6%) | 24 (36.4%) | 15 (71.4%) | 15 (88.2%) |

Notes: Data are shown as number of patients with the comorbidity (percentage of the total in that group). Because a patient may have multiple comorbidities, percentages across comorbidities may sum to >100%.

* In the congenital group, “other malformations” include congenital anorectal malformation, renal dysplasia, etc.

† In the cardiac compression group, “other malformations” include branchial cleft fistula and chromosomal abnormality syndromes, etc.

S2B. Distribution of the number of comorbidities per patient

| **Number of comorbidities** | **Congenital (n=46)** | **Cardiac compression (n=66)** | **Dynamic (n=21)** | **Acquired (n=17)** |
| --- | --- | --- | --- | --- |
| 0 | 31 (67.4%) | 42 (63.6%) | 6 (28.6%) | 2 (11.8%) |
| 1 | 11 (23.9%) | 17 (25.8%) | 9 (42.9%) | 6 (35.3%) |
| ≥2 | 4 (8.7%) | 7 (10.6%) | 6 (28.6%) | 9 (52.9%) |

Note: Data are shown as number of patients (percentage of the total in that group).
